# Supplementary material for: Evolutionary superscaffolding and chromosome anchoring to improve Anopheles genome assemblies
Source: BMC Biol. 2020 Jan 2;18:1. doi: 10.1186/s12915-019-0728-3 (PMC6939337; doi:10.1186/s12915-019-0728-3)
Supplement: Supplementary file 5 — Additional file 5. Chromosome mapping data. Reconciled chromosome-mapped scaffolds. [file 12915_2019_728_MOESM5_ESM.xlsx]

## Sheet: A.albimanus
Assembly	Scaffold1	Scaffold2	Scaf1_orientation	Scaf2_orientation	Region_scaf1	Region_scaf2	Scaf1_size	Scaf2_size
AALBS1	KB672457	KB672404	-	+	X:1A-3A	X:3A-3C	8610254	1315522
AALBS1	KB672404	KB672407	+	+	X:3A-3C	X:3C-4A	1315522	636932
AALBS1	KB672407	KB672406	+	-	X:3C-4A	X:4A-4C	636932	778592
AALBS1	KB672412	KB672414	+	-	X:5A	X:5A-5B	221820	254859
AALBS1	KB672446	KB672397C	-	-	2R:6A-9A	2R:9A-10B	9735467	6174178
AALBS1	KB672397C	KB672331	-	-	2R:9A-10B	2R:10B-10C	6174178	2547207
AALBS1	KB672331	KB672397B	-	-	2R:10B-10C	2R:10C-11B	2547207	4937263
AALBS1	KB672397B	KB672320	-	+	2R:10C-11B	2R:11B-12A	4937263	2643688
AALBS1	KB672320	KB672298A	+	+	2R:11B-12A	2R:12A	2643688	426774
AALBS1	KB672298A	KB672435B	+	-	2R:12A	2R:12A-13A	426774	7248733
AALBS1	KB672479	KB672468A	+	-	2R:13A-13C	2R:13C-14B	4205160	5915397
AALBS1	KB672468A	KB672397D	-	-	2R:13C-14B	2R:14B-14C	5915397	910984
AALBS1	KB672397D	KB672435D	-	-	2R:14B-14C	2R:14C-15A	910984	3727725
AALBS1	KB672435D	KB672409	-	-	2R:14C-15A	2R:15A	3727725	300361
AALBS1	KB672409	KB672353	-	+	2R:15A	2R:15A-15B	300361	1845436
AALBS1	KB672353	KB672408	+	-	2R:15A-15B	2R:15B-15C	1845436	393488
AALBS1	KB672408	KB672411	-	+	2R:15B-15C	2R:15C-15C	393488	288597
AALBS1	KB672435A	KB672413	+	-	2L:16A-17B	2L:17B-23B	3408218	22635183
AALBS1	KB672413	KB672397A	-	-	2L:17B-23B	2L:23B-25B	22635183	11932447
AALBS1	KB672287A	KB672424	+	+	3R:26A-26B	3R:26B-32A	2754385	18068499
AALBS1	KB672424	KB672298B	+	-	3R:26B-32A	3R:32A-32C	18068499	2468322
AALBS1	KB672298B	KB672435C	-	-	3R:32A-32C	3R:32C-33A	2468322	883903
AALBS1	KB672435C	KB672309	-	+	3R:32C-33A	3R:33A-33B	883903	2815218
AALBS1	KB672309	KB672386	+	-	3R:33A-33B	3R:33B-33C	2815218	1286344
AALBS1	KB672386	KB672287B	-	+	3R:33B-33C	3R:33?-34A	1286344	360489
AALBS1	KB672287B	KB672364	+	+	3R:33?-34A	3R:34A-34B	360489	1390780
AALBS1	KB672405	KB672375	-	-	3R:34B-35A	3R:35A-35B	851493	1459936
AALBS1	KB672375	KB672418	-	+	3R:35A-35B	3R:35B-35B	1459936	204975
AALBS1	KB672468B	?	?	?	3R:35B	?	136759	?
AALBS1	KB672415	KB672398	+	+	3L:36A-36B	3L:36B-37A	178137	1248850
AALBS1	KB672398	KB672342	+	+	3L:36B-37A	3L:37A-38A	1248850	1994720
AALBS1	KB672342	KB672286	+	+	3L:37A-38A	3L:38A-45B	1994720	30179321

## Sheet: A.atroparvus
Assembly	Scaffold1	Scaffold2	Scaf1_orientation	Scaf2_orientation	Region_scaf1	Region_scaf2	Scaf1_size	Scaf2_size
AATRE1	KI421896	KI421895	+	+	X:1A-2A	X:2A-2C	4495915	4588469
AATRE1	KI421895	KI421926	+	?	X:2A-2C	X:3A	4588469	234572
AATRE1	KI421926	KI421918	?	-	X:3A	X:3A-3B	234572	495384
AATRE1	KI421918	KI421907	-	-	X:3A-3B	X:3B-3C	495384	1657219
AATRE1	KI421907	KI421898	-	-	X:3B-3C	X:3C-4A	1657219	4025992
AATRE1	KI421898	KI421920	-	+	X:3C-4A	X:4A-4B	4025992	404876
AATRE1	KI421920	KI421921	+	?	X:4A-4B	X:4B	404876	427311
AATRE1	KI421921	KI421919	?	+	X:4B	X:4B-4C	427311	423356
AATRE1	KI421919	KI421934	+	?	X:4B-4C	X:4C	423356	206528
AATRE1	KI421934	KI421927	?	?	X:4C	X:4C	206528	265147
AATRE1	KI421927	KI421935	?	?	X:4C	X:5A	265147	277828
AATRE1	KI421882	KI421890	-	-	2R:6A-9B	2R:9B-10B	20238125	9206694
AATRE1	KI421890	KI421911	-	-	2R:9B-10B	2R:10B-11A	9206694	814329
AATRE1	KI421911	KI421912	-	-	2R:10B-11A	2R:11A	814329	785772
AATRE1	KI421912	KI421889	-	-	2R:11A	2R:11A-13B	785772	9380469
AATRE1	KI421889	KI421900	-	-	2R:11A-13B	2R:13B-14C	9380469	3534686
AATRE1	KI422039	?	+	?	2R:?	?	28kb	?
AATRE1	KI421930	?	+	?	2R:?	?	295kb	?
AATRE1	KI421924	?	+	?	2R:14C	?	300483	?
AATRE1	KI422149	?	+	?	2R:?	?	24kb	?
AATRE1	KI421922	?	-	?	2R:14D	?	450785	?
AATRE1	KI421894	KI421886	+	+	2L:15A-15B	2L:16A-17D	5662806	11808074
AATRE1	KI421938	?	-	?	2L:?	?	147kb	?
AATRE1	KI421905	KI421891	+	-	2L:17D	2L:17D-19B	2366404	7496699
AATRE1	KI421891	KI421916	-	-	2L:17D-19B	2L:19B	7496699	622861
AATRE1	KI421916	KI421884	-	+	2L:19B	2L:19B-21C	622861	13649947
AATRE1	KI421888	KI421914	+	-	3R:22A-23A	3R:23A-23B	10083987	821363
AATRE1	KI421914	KI421906	-	+	3R:23A-23B	3R:23B-23C	821363	1914387
AATRE1	KI421906	KI421883	+	+	3R:23B-23C	3R:23C-25C	1914387	16623535
AATRE1	KI421883	KI421892	+	+	3R:23C-25C	3R:25C-27B	16623535	7594930
AATRE1	KI421892	KI421885	+	+	3R:25C-27B	3R:27B-31A	7594930	12071184
AATRE1	KI421885	KI421897	+	-	3R:27B-31A	3R:31A-32A	12071184	4671747
AATRE1	KI421897	KI421915	-	+	3R:31A-32A	3R:32A	4671747	722338
AATRE1	KI421915	KI421904	+	+	3R:32A	3R:32A-32B	722338	2066620
AATRE1	KI421904	KI421908	+	-	3R:32A-32B	3R:32B-32C	2066620	1630999
AATRE1	KI421973	?	+	?	3L:?	?	113k	?
AATRE1	KI422027	?	+	?	3L:?	?	33k	?
AATRE1	KI421917	?	+	?	3L:?	?	640k	?
AATRE1	KI421925	?	-	?	3L:?	?	318k	?
AATRE1	KI421909	KI421913	-	-	3L:33A-33B	3L:33B	1484777	725135
AATRE1	KI421913	KI421910	-	-	3L:33B	3L:33B-33C	725135	1542149
AATRE1	KI421910	KI421902	-	+	3L:33B-33C	3L:33C-34B	1542149	2709063
AATRE1	KI421902	KI421903	+	+	3L:33C-34B	3L:34B-34C	2709063	2389045
AATRE1	KI421903	KI421901	+	-	3L:34B-34C	3L:34C-35C	2389045	4192108
AATRE1	KI421901	KI421899	-	-	3L:34C-35C	3L:35C-36C	4192108	4758701
AATRE1	KI421899	KI421923	-	+	3L:35C-36C	3L:36C	4758701	440738
AATRE1	KI421923	KI421893	+	-	3L:36C	3L:36C-38B	440738	8157176
AATRE1	KI421893	KI421887	-	+	3L:36C-38B	3L:38B-39E	8157176	10405585

## Sheet: A.funestus
AfunF1 scaffolds	Scaffold orientation	Chromosome region	Scaffold size	Method of placement to the map
KB668763	-	X:1A	305818	PACBIO OVERLAP
KB669058	+	X:1AB	2367365	MAPPED
KB668322	-	X:1B	615127	MAPPED
KB668245	-	X:1C	629234	MAPPED
KB669125	-	X:1C	833292	MAPPED
KB669181	-	X:1C	789512	PACBIO OVERLAP
KB668600	-	X:1D	671960	MAPPED
KB668720	+	X:1D	419310	PACBIO OVERLAP
KB668844	+	X:1D	215519	PACBIO OVERLAP
KB668852	+	X:1D	216557	MAPPED
KB668755	+	X:2A	379841	PACBIO OVERLAP
KB668367	?	X:2B	636359	MAPPED
KB668936	+	X:2BC	1176300	MAPPED
KB669143	-	X:2C	12834	PACBIO OVERLAP
KB669145	-	X:3A	12715	PACBIO OVERLAP
KB668668	-	X:3AB	583467	MAPPED
KB669003	-	X:3CD	1206901	MAPPED
KB668797	+	X:3D	250364	PACBIO OVERLAP
KB668522	+	X:4A	703988	MAPPED
KB669029	+	X:4A	88731	PACBIO OVERLAP
KB669078	-	X:4AB	51937	PACBIO OVERLAP
KB668688	?	X:5C	429614	MAPPED
KB668389	?	X:5C	547300	PACBIO OVERLAP
KB668765	?	X:6	305606	PACBIO OVERLAP
KB668660	?	X:6	504041	PACBIO OVERLAP
KB668760	?	X:6	504041	MAPPED
KB669536	?	X:6	625123	MAPPED
KB668728	?	2R:7A	333164	MAPPED
KB668825	?	2R:7BC	1174813	MAPPED
KB668221	+	2R:8AE	3832769	MAPPED
KB668954	+	2R:9A	66343	PACBIO OVERLAP
KB669004	+	2R:9A	57566	PACBIO OVERLAP
KB669169	+	2R:9A-10B	1771395	MAPPED
KB668759	-	2R:10BC	1353732	MAPPED
KB668737	+	2R:10C	1261231	MAPPED
KB668555	-	2R:10D-11A	1493947	MAPPED
KB668845	?	2R:11B	188083	MAPPED
KB668753	-	2R:11C	343795	PACBIO OVERLAP
KB668871	+	2R:11C	218729	PACBIO OVERLAP
KB668467	-	2R:12A	563073	MAPPED
KB669369	+	2R:12B	804489	MAPPED
KB668822	?	2R:12B	194798	MAPPED
KB668793	?	2R:12C	254162	MAPPED
KB668745	?	2R:12C	346721	PACBIO OVERLAP
KB668672	-	2R:12D	584724	MAPPED
KB668775	-	2R:12D	355205	PACBIO OVERLAP
KB668785	-	2R:12E	408060	MAPPED
KB669081	-	2R:12E-13A	1051734	MAPPED
KB668706	?	2R:13A	572386	MAPPED
KB668715	?	2R:13B	364622	MAPPED
KB668766	?	2R:13C	300363	MAPPED
KB668757	?	2R:13C	303086	PACBIO OVERLAP
KB668411	?	2R:13CD	533316	PACBIO OVERLAP
KB668679	?	2R:13D	436776	MAPPED
KB668478	?	2R:14B	598359	MAPPED
KB669525	?	2R:14C	624454	MAPPED
KB668835	-	2R:14D	178699	MAPPED
KB669358	-	2R:15B	786284	MAPPED
KB668911	?	2R:15C	97490	MAPPED
KB669547	?	2R:15E	618077	MAPPED
KB668914	+	2R:15E-16A	1038133	MAPPED
KB668837	?	2R:16A	1126662	MAPPED
KB669192	?	2R:16B	922711	MAPPED
KB668748	?	2R:16C	1398093	MAPPED
KB668670	-	2R:17AB	1428115	MAPPED
KB668947	+	2R:17C-18A	2413216	MAPPED
KB668742	-	2R:18A	317854	PACBIO OVERLAP
KB668234	+	2R:18AB	602066	MAPPED
KB668734	-	2R:18C	433875	MAPPED
KB668836	+	2R:18CD	2772343	MAPPED
KB668289	-	2R:18D	644640	PACBIO OVERLAP
KB669247	+	2R:19A	782462	PACBIO OVERLAP
KB668866	-	2R:19B	140173	PACBIO OVERLAP
KB669114	-	2R:19C	878476	MAPPED
KB668942	-	2R:19C	101067	PACBIO OVERLAP
KB668870	-	2R:19CD	1070199	MAPPED
KB668694	-	2R:19DE	522677	PACBIO OVERLAP
KB669281	?	2L:20BC	897800	MAPPED
KB669092	?	2L:20C	887634	MAPPED
KB669070	?	2L:20D	943178	MAPPED
KB668589	+	2L:21BC	555648	PACBIO OVERLAP
KB668770	+	2L:21C	1246493	MAPPED
KB668781	-	2L:21CD	1311501	MAPPED
KB668222	-	2L:21D-22A	1876834	MAPPED
KB668692	-	2L:22AC	1835194	MAPPED
KB668872	-	2L:22C	248811	MAPPED
KB669502	?	2L:22D	1948688	MAPPED
KB668882	+	2L:23A	121550	MAPPED
KB668803	+	2L:24AB	1311425	MAPPED
KB669036	+	2L:24B	850007	PACBIO OVERLAP
KB668433	-	2L:24B	552028	PACBIO OVERLAP
KB669280	+	2L:24CD	1738428	MAPPED
KB668854	?	2L:26A	204352	PACBIO OVERLAP
KB669047	?	2L:26A	999242	MAPPED
KB668681	+	2L:26C	1609593	MAPPED
KB668702	-	2L:26C	460558	PACBIO OVERLAP
KB668764	-	2L:26CD	327039	MAPPED
KB668693	+	2L:26D	518197	MAPPED
KB668278	-	2L:27A	702492	PACBIO OVERLAP
KB669136	-	2L:27AB	882720	MAPPED
KB668813	?	2L:27C	258639	PACBIO OVERLAP
KB668795	?	2L:27C	281738	MAPPED
KB669214	?	2L:27CD	874018	PACBIO OVERLAP
KB668992	?	2L:27D	953533	MAPPED
KB668751	?	2L:27E	335862	MAPPED
KB668892	?	2L:27E	1102954	PACBIO OVERLAP
KB668725	?	2L:28A	3134932	MAPPED
KB668881	?	2L:28C	976588	MAPPED
KB668378	?	3R:29B	571908	MAPPED
KB669236	?	3R:29C	713413	MAPPED
KB668851	?	3R:29C	164446	PACBIO OVERLAP
KB668683	?	3R:29CD	458860	MAPPED
KB669458	-	3R:29D-30A	679292	MAPPED
KB668792	?	3R:30AC	1431544	MAPPED
KB668633	?	3R:30C	577339	MAPPED
KB669089	?	3R:30C	19591	PACBIO OVERLAP
KB668687	?	3R:30C	589177	PACBIO OVERLAP
KB668808	+	3R:30C	233839	MAPPED
KB668705	+	3R:30CD	400982	PACBIO OVERLAP
KB668695	?	3R:31C	480392	PACBIO OVERLAP
KB668812	?	3R:31CD	217759	MAPPED
KB668644	?	3R:32B	475666	MAPPED
KB669580	?	3R:32B	640366	PACBIO OVERLAP
KB668789	?	3R:33A	318576	MAPPED
KB668661	+	3R:33C	494022	MAPPED
KB668533	?	3R:33C	534943	MAPPED
KB668723	?	3R:33D	382759	MAPPED
KB669347	?	3R:33D	864369	MAPPED
KB668746	?	3R:34A	323294	MAPPED
KB668818	?	3R:34A	257953	PACBIO OVERLAP
KB668750	-	3R:34B	390086	PACBIO OVERLAP
KB668848	-	3R:34BC	1452984	MAPPED
KB668671	?	3R:35B	710502	MAPPED
KB668853	?	3R:35B	306342	MAPPED
KB668790	?	3R:35C	381342	MAPPED
KB668700	-	3R:35CD	478136	PACBIO OVERLAP
KB668684	+	3R:35D	499467	PACBIO OVERLAP
KB669103	-	3R:35DE	1272063	MAPPED
KB669336	+	3R:35E	1014753	MAPPED
KB668456	+	3R:35EF	708050	MAPPED
KB669011	-	3R:35F	39851	MAPPED
KB668709	-	3R:35F	491865	MAPPED
KB668752	-	3R:35F	447341	PACBIO OVERLAP
KB668816	+	3R:35F	290561	MAPPED
KB668880	+	3R:35F	119321	MAPPED
KB669403	+	3R:35F	972476	MAPPED
KB669034	+	3R:35F	31323	PACBIO OVERLAP
KB668756	-	3R:35F	460866	PACBIO OVERLAP
KB668777	-	3R:36A	381111	MAPPED
KB668731	-	3R:36A	405878	MAPPED
KB668779	-	3R:36A	398220	PACBIO OVERLAP
KB668987	-	3R:36AB	46664	PACBIO OVERLAP
KB669414	+	3R:36B	997879	PACBIO OVERLAP
KB668810	+	3R:36B	310469	PACBIO OVERLAP
KB669380	+	3R:36B	770134	PACBIO OVERLAP
KB668858	+	3R:36B	254377	PACBIO OVERLAP
KB668667	+	3R:36B	580684	MAPPED
KB668806	+	3R:36C	292235	MAPPED
KB668874	+	3R:36C	134456	MAPPED
KB668959	+	3R:36D	938304	MAPPED
KB668732	+	3R:36D	346637	MAPPED
KB668999	-	3R:36D	106097	PACBIO OVERLAP
KB669391	-	3R:36DE	2124680	MAPPED
KB669436	-	3R:36E	911299	MAPPED
KB668819	-	3R:36E	222314	PACBIO OVERLAP
KB668744	-	3R:36E	359052	PACBIO OVERLAP
KB669469	+	3R:36F	758275	MAPPED
KB669203	+	3R:36F	774987	PACBIO OVERLAP
KB668970	+	3R:37A	879108	PACBIO OVERLAP
KB668726	+	3R:37AB	1292245	MAPPED
KB668762	-	3R:37C	351750	PACBIO OVERLAP
KB668805	-	3L:38A	229600	MAPPED
KB668859	+	3L:38B	1041161	MAPPED
KB668823	?	3L:38C	194609	MAPPED
KB669325	?	3L:39A	699719	MAPPED
KB668717	?	3L:39A	402095	MAPPED
KB668578	?	3L:39A	505528	MAPPED
KB668676	?	3L:39A	439401	PACBIO OVERLAP
KB668659	?	3L:39B	1545011	MAPPED
KB669014	?	3L:40A	892505	MAPPED
KB668773	?	3L:40A	296798	PACBIO OVERLAP
KB668868	?	3L:40B	141784	MAPPED
KB668918	?	3L:40B	93149	MAPPED
KB668444	?	3L:41A	1547433	MAPPED
KB668754	?	3L:41D	348546	MAPPED
KB668830	?	3L:41D	181046	MAPPED
KB668333	+	3L:42AB	1525199	MAPPED
KB668422	?	3L:42D	532383	MAPPED
KB668500	?	3L:43A	547302	MAPPED
KB668925	?	3L:43B	940405	MAPPED
KB669025	?	3L:44B	910511	MAPPED
KB669264	?	3L:44B	32220	MAPPED
KB669603	?	3L:44C	2248	MAPPED
KB668849	?	3L:44C	159962	MAPPED
KB668784	?	3L:45A	266933	MAPPED
KB668948	-	3L:46B	917728	PACBIO OVERLAP
KB668682	-	3L:46B	470092	MAPPED
KB668714	-	3L:46BC	1305928	MAPPED
KB668703	-	3L:46CD	1311118	MAPPED
KB669207	?	3L:46D	62723	MAPPED
KB668252	?	3L:46D	2000	MAPPED
KB668265	?	3L:46D	1954	MAPPED

## Sheet: A.sinensis-China
Assembly	Scaffold1	Scaffold2	Scaf1_orientation	Scaf2_orientation	Region_scaf1	Region_scaf2
AsinC2	AS2_scf7180000695491	AS2_scf7180000695557	+	-	X:1A	X:1AB
AsinC2	AS2_scf7180000695557	AS2_scf7180000695865	-	-	X:1AB	X:1BC
AsinC2	AS2_scf7180000695865	AS2_scf7180000695541	-	+	X:1BC	X:1C-2A
AsinC2	AS2_scf7180000695541	AS2_scf7180000696079	+	+	X:1C-2A	X:2AB
AsinC2	AS2_scf7180000696079	AS2_scf7180000695680	+	+	X:2AB	X:2B-3A
AsinC2	AS2_scf7180000695680	AS2_scf7180000696050	+	-	X:2B-3A	X:3A-4A
AsinC2	AS2_scf7180000696050	AS2_scf7180000695709	-	+	X:3A-4A	X:4A-5A
AsinC2	AS2_scf7180000695705	?	+	?	2R:6C	?
AsinC2	AS2_scf7180000695681	?	?	?	2R:7B	?
AsinC2	AS2_scf7180000696027	AS2_scf7180000696017	-	-	2R:8A	2R:8B
AsinC2	AS2_scf7180000696051	AS2_scf7180000696133	+	+	2R:9B	2R:9B-10A
AsinC2	AS2_scf7180000696054	?	-	?	2R:10C-11A	?
AsinC2	AS2_scf7180000696041	?	-	?	2R:11B	?
AsinC2	AS2_scf7180000695763	?	-	?	2R:11C-12A	?
AsinC2	AS2_scf7180000696013	?	+	?	2R:13A	?
AsinC2	AS2_scf7180000695690	?	+	?	2R:14AB	?
AsinC2	AS2_scf7180000696012	?	-	?	2R:14CD	?
AsinC2	AS2_scf7180000696047	?	-	?	2L:17AB	?
AsinC2	AS2_scf7180000696045	AS2_scf7180000696048	+	+	2L:18A	2L:18B
AsinC2	AS2_scf7180000696056	?	+	?	2L:18C	?
AsinC2	AS2_scf7180000695983	AS2_scf7180000696058	?	+	2L:19B	2L:20A
AsinC2	AS2_scf7180000696057	?	+	?	2L:20D	?
AsinC2	AS2_scf7180000696060	?	+	?	2L:22C-23B	?
AsinC2	AS2_scf7180000695970	?	+	?	3R:24AB	?
AsinC2	AS2_scf7180000695742	AS2_scf7180000695544	+	-	3R:24B-25A	3R:25AB
AsinC2	AS2_scf7180000696022	?	+	?	3R:27BC	?
AsinC2	AS2_scf7180000694399	?	+	?	3R:28B	?
AsinC2	AS2_scf7180000695645	?	?	?	3R:29B	?
AsinC2	AS2_scf7180000695987	AS2_scf7180000687438	-	-	3R:30A	3R:30A
AsinC2	AS2_scf7180000696078	AS2_scf7180000691904	+	+	3R:31A	3R:31A
AsinC2	AS2_scf7180000695864	AS2_scf7180000696020	+	-	3R:32A	3R:32A
AsinC2	AS2_scf7180000696131	AS2_scf7180000695941	+	-	3R:32B	3R:32C
AsinC2	AS2_scf7180000696018	?	+	?	3L:33A	?
AsinC2	AS2_scf7180000696001	AS2_scf7180000695556	-	-	3L:34C	3L:34CD
AsinC2	AS2_scf7180000695556	AS2_scf7180000696053	-	?	3L:34CD	3L:35A
AsinC2	AS2_scf7180000695549	AS2_scf7180000696039	+	-	3L:37A	3L:37A
AsinC2	AS2_scf7180000695747	AS2_scf7180000696026	-	-	3L:37C	3L:37C-38A
AsinC2	AS2_scf7180000696026	AS2_scf7180000696059	-	-	3L:37C-38A	3L:38B
AsinC2	AS2_scf7180000696059	AS2_scf7180000696055	-	+	3L:38B	3L:38C-39C

## Sheet: A.stephensi-India
Assembly	Scaffold1	Scaffold2	Scaf1_orientation	Scaf2_orientation	Region_scaf1	Region_scaf2
AsteI2	scaffold_00015	?	-	?	X:1AC	?
AsteI2	scaffold_00058	?	-	?	X:1C-2A	?
AsteI2	scaffold_00023	scaffold_00076	-	?	X:2AC	X:3A
AsteI2	scaffold_00076	scaffold_00047	?	?	X:3A	X:3B
AsteI2	scaffold_00047	scaffold_00004	?	+	X:3B	X:3B-4B
AsteI2	scaffold_00004	scaffold_00038	+	?	X:3B-4B	X:4C-5C
AsteI2	scaffold_00038	scaffold_00141	?	?	X:4C-5C	X:6A
AsteI2	scaffold_00141	scaffold_00104	?	?	X:6A	X:6A
AsteI2	scaffold_00061	?	?	?	2R:7A	?
AsteI2	scaffold_00033	scaffold_00013	-	?	2R:7BC	2R:7C-8B
AsteI2	scaffold_00013	scaffold_00020	?	-	2R:7C-8B	2R:8C-9A
AsteI2	scaffold_00020	scaffold_00156	-	?	2R:8C-9A	2R:9A
AsteI2	scaffold_00156	scaffold_00060	?	?	2R:9A	2R:9AB
AsteI2	scaffold_00060	scaffold_00031	?	+	2R:9AB	2R:9CD
AsteI2	scaffold_00031	scaffold_00179	+	?	2R:9CD	2R:10A
AsteI2	scaffold_00179	scaffold_00001	?	-	2R:10A	2R:10A-11A
AsteI2	scaffold_00001	scaffold_00096	-	?	2R:10A-11A	2R:11B
AsteI2	scaffold_00096	scaffold_00089	?	?	2R:11B	2R:11C
AsteI2	scaffold_00089	scaffold_00022	?	?	2R:11C	2R:11D-12A
AsteI2	scaffold_00022	scaffold_00056	?	?	2R:11D-12A	2R:12AB
AsteI2	scaffold_00056	scaffold_00016	?	-	2R:12AB	2R:12B-13A
AsteI2	scaffold_00016	scaffold_00055	-	?	2R:12B-13A	2R:13AB
AsteI2	scaffold_00117	scaffold_00074	?	+	2R:13B	2R:13BC
AsteI2	scaffold_00074	scaffold_00014	+	-	2R:13BC	2R:13C-14B
AsteI2	scaffold_00286	scaffold_00002	?	+	2R:14B	2R:14C-17A
AsteI2	scaffold_00077	scaffold_00149	?	?	2R:17A	2R:17B
AsteI2	scaffold_00149	scaffold_00003	?	-	2R:17B	2R:17B-18B
AsteI2	scaffold_00003	scaffold_00063	-	?	2R:17B-18B	2R:18C
AsteI2	scaffold_00063	scaffold_00261	?	?	2R:18C	2R:18C
AsteI2	scaffold_00079	scaffold_00048	?	?	2R:18C	2R:18D
AsteI2	scaffold_00048	scaffold_00054	?	?	2R:18D	2R:19A
AsteI2	scaffold_00026	?	+	?	2R:19BC	?
AsteI2	scaffold_00073	scaffold_00046	-	?	2R:19D	2R:19E
AsteI2	scaffold_00046	scaffold_10315	?	?	2R:19E	2R:19E
AsteI2	scaffold_00066	scaffold_00093	?	?	2L:20A	2L:20A
AsteI2	scaffold_00093	scaffold_00043	?	+	2L:20A	2L:20B
AsteI2	scaffold_00043	scaffold_00235	+	?	2L:20B	2L:20B
AsteI2	scaffold_00235	scaffold_00085	?	+	2L:20B	2L:21A
AsteI2	scaffold_00085	scaffold_00028	+	?	2L:21A	2L:21A
AsteI2	scaffold_00030	scaffold_00049	?	?	2L:22B	2L:22B
AsteI2	scaffold_00049	scaffold_00084	?	?	2L:22B	2L:22B-23A
AsteI2	scaffold_00071	scaffold_00113	?	?	2L:23A	2L:23A
AsteI2	scaffold_00091	scaffold_00018	?	?	2L:23B	2L:24A
AsteI2	scaffold_00075	?	?	?	2L:24A	?
AsteI2	scaffold_00040	scaffold_00080	?	?	2L:24B	2L:25A
AsteI2	scaffold_00080	scaffold_00021	?	+	2L:25A	2L:25BC
AsteI2	scaffold_00021	scaffold_00095	+	?	2L:25BC	2L:25C
AsteI2	scaffold_00100	?	?	?	2L:26A	?
AsteI2	scaffold_00036	scaffold_00034	?	-	2L:26B	2L:26C-27A
AsteI2	scaffold_00032	?	+	?	2L:27B	?
AsteI2	scaffold_00044	scaffold_00067	-	?	2L:27C-28A	2L:28B
AsteI2	scaffold_00067	scaffold_00009	?	?	2L:28B	2L:28B
AsteI2	scaffold_00057	scaffold_00006	?	+	3R:29AB	3R:29BE
AsteI2	scaffold_00012	?	?	?	3R:30A	?
AsteI2	scaffold_00042	?	?	?	3R:30C	?
AsteI2	scaffold_00053	scaffold_00099	+	?	3R:31A	3R:31A
AsteI2	scaffold_00099	scaffold_00017	?	-	3R:31A	3R:31B
AsteI2	scaffold_00029	?	-	?	3R:31C-32A	?
AsteI2	scaffold_00106	scaffold_00097	?	?	3R:32C	3R:32C
AsteI2	scaffold_00090	?	?	?	3R:32C	?
AsteI2	scaffold_00094	scaffold_00025	?	-	3R:33A	3R:33BC
AsteI2	scaffold_00025	scaffold_00052	-	?	3R:33BC	3R:33C
AsteI2	scaffold_00027	?	-	?	3R:34AB	?
AsteI2	scaffold_00007	?	+	?	3R:35A	?
AsteI2	scaffold_00041	scaffold_00050	?	-	3R:35B	3R:35B-36A
AsteI2	scaffold_00050	scaffold_00037	-	?	3R:35B-36A	3R:36B
AsteI2	scaffold_00181	?	?	?	3R:36B	?
AsteI2	scaffold_00019	?	?	?	3R:36C	?
AsteI2	scaffold_00065	scaffold_00059	?	+	3R:37B	3R:37D
AsteI2	scaffold_00059	scaffold_00105	+	?	3R:37D	3R:37D
AsteI2	scaffold_00062	?	-	?	3L:38AB	?
AsteI2	scaffold_00035	?	+	?	3L:38BC	?
AsteI2	scaffold_00081	?	?	?	3L:38E	?
AsteI2	scaffold_00088	scaffold_00068	-	-	3L:38F	3L:38F-39A
AsteI2	scaffold_00068	scaffold_00051	-	-	3L:38F-39A	3L:39AB
AsteI2	scaffold_00121	?	?	?	3L:39B	?
AsteI2	scaffold_00092	?	?	?	3L:39C	?
AsteI2	scaffold_00087	scaffold_00078	?	?	3L:39C	3L:40A
AsteI2	scaffold_00078	scaffold_00136	?	+	3L:40A	3L:40AB
AsteI2	scaffold_00111	?	?	?	3L:40B	?
AsteI2	scaffold_00086	scaffold_00064	?	?	3L:40C	3L:40C
AsteI2	scaffold_00070	scaffold_00045	-	+	3L:40D	3L:40D
AsteI2	scaffold_00045	scaffold_00082	+	?	3L:40D	3L:41A
AsteI2	scaffold_00083	scaffold_00008	?	+	3L:41B	3L:41B-42A
AsteI2	scaffold_00008	scaffold_00110	+	?	3L:41B-42A	3L:42B
AsteI2	scaffold_00110	scaffold_00072	?	?	3L:42B	3L:42C
AsteI2	scaffold_00072	scaffold_02336	?	?	3L:42C	3L:42C
AsteI2	scaffold_00024	scaffold_00069	-	+	3L:43A	3L:43AB
AsteI2	scaffold_00069	scaffold_00010	+	-	3L:43AB	3L:43C-44A
AsteI2	scaffold_00039	?	?	?	3L:44C	?
AsteI2	scaffold_00011	?	-	?	3L:45AC	?
AsteI2	scaffold_00005	?	+	?	3L:46AD	?

## Sheet: A.stephensi-SDA
Assembly	Scaffold1	Scaffold2	Scaf1_orientation	Scaf2_orientation	Chromosome
AsteS1	KB664732	?	+	?	X
AsteS1	KB665121	?	?	?	X
AsteS1	KB664910	?	?	?	X
AsteS1	KB664821	?	+	?	X
AsteS1	KB664567	?	?	?	X
AsteS1	KB664677	KB664415	?	+	X
AsteS1	KB664733	?	?	?	2R
AsteS1	KB664651	KB664943	?	?	2R
AsteS1	KB664843	?	?	?	2R
AsteS1	KB664522	KB665099	?	?	2R
AsteS1	KB665099	KB664576	?	?	2R
AsteS1	KB664527	KB665299	?	?	2R
AsteS1	KB665299	KB664954	?	?	2R
AsteS1	KB664423	?	+	?	2R
AsteS1	KB664484	KB664666	?	?	2R
AsteS1	KB664666	KB664378	?	?	2R
AsteS1	KB664378	KB664532	?	?	2R
AsteS1	KB664532	KB665265	?	?	2R
AsteS1	KB664550	?	?	?	2R
AsteS1	KB664323	?	-	?	2R
AsteS1	KB664460	KB664999	?	?	2R
AsteS1	KB664524	KB665088	+	?	2R
AsteS1	KB664466	?	?	?	2R
AsteS1	KB664623	?	+	?	2R
AsteS1	KB664966	?	?	?	2R
AsteS1	KB664899	?	?	?	2R
AsteS1	KB664334	?	?	?	2R
AsteS1	KB664389	KB664517	+	?	2R
AsteS1	KB664517	KB665376	?	?	2R
AsteS1	KB665376	KB664679	?	?	2R
AsteS1	KB664526	KB664428	?	-	2R
AsteS1	KB664618	?	?	?	2R
AsteS1	KB664622	?	?	?	2R
AsteS1	KB665065	?	+	?	2R
AsteS1	KB664766	?	-	?	2L
AsteS1	KB664480	?	?	?	2L
AsteS1	KB664513	?	+	?	2L
AsteS1	KB664888	?	?	?	2L
AsteS1	KB664988	?	?	?	2L
AsteS1	KB665354	?	?	?	2L
AsteS1	KB665287	?	?	?	2L
AsteS1	KB664855	?	-	?	2L
AsteS1	KB664462	KB664473	?	?	2L
AsteS1	KB664473	KB664565	?	?	2L
AsteS1	KB664421	KB664288	?	?	3R
AsteS1	KB664288	KB664437	-	-	3R
AsteS1	KB664437	KB665154	-	?	3R
AsteS1	KB664559	?	?	?	3R
AsteS1	KB664621	?	+	?	3R
AsteS1	KB664633	KB664543	?	?	3R
AsteS1	KB664644	?	-	?	3R
AsteS1	KB664467	?	?	?	3R
AsteS1	KB664429	?	-	?	3R
AsteS1	KB664544	KB664810	?	?	3R
AsteS1	KB665343	?	?	?	3R
AsteS1	KB664955	?	?	?	3R
AsteS1	KB664549	?	-	?	3R
AsteS1	KB664457	?	?	?	3R
AsteS1	KB664708	KB664401	?	?	3R
AsteS1	KB665038	?	?	?	3R
AsteS1	KB665177	?	?	?	3R
AsteS1	KB664461	?	?	?	3R
AsteS1	KB664444	?	?	?	3R
AsteS1	KB664514	?	?	?	3R
AsteS1	KB664442	?	?	?	3L
AsteS1	KB664799	?	-	?	3L
AsteS1	KB664422	KB664510	?	+	3L
AsteS1	KB664459	KB664482	?	+	3L
AsteS1	KB664482	KB664545	+	?	3L
AsteS1	KB664583	?	?	?	3L
AsteS1	KB664433	?	+	?	3L
AsteS1	KB664832	KB664692	?	?	3L
AsteS1	KB665021	?	?	?	3L
AsteS1	KB664477	?	+	?	3L
AsteS1	KB664610	?	?	?	3L
AsteS1	KB664844	?	+	?	3L
AsteS1	KB664721	KB665365	?	?	3L
AsteS1	KB665365	KB664289	?	+	3L
AsteS1	KB664289	KB664977	+	-	3L
AsteS1	KB664977	KB664599	-	-	3L

## Sheet: A.arabiensis
Scaffold	Chr	Ori
KB704784	X	+
KB704551	X	-
KB704474	X	-
KB704674	X	+
KB704540	X	+
KB704673	2R	+
KB704740	2R	-
KB705228	2R	-
KB704451	2R	+
KB704126	2R	+
KB704640	2R	+
KB704407	2R	-
KB704385	2R	-
KB704563	2R	-
KB704696	2R	+
KB704618	2R	+
KB704751	2R	+
KB704607	2L	+
KB704529	2L	+
KB704396	2L	-
KB704773	2L	-
KB704496	2L	-
KB704895-2L	2L	-
KB704452	2L	-
KB704237	2L	-
KB704718	2L	-
KB704125	2L	+
KB704585	3R	+
KB704374	3R	-
KB704562	3R	-
KB704429	3R	+
KB704796	3R	+
KB704707	3R	-
KB704463	3R	+
KB704485	3R	-
KB704518	3R	-
KB704685	3R	+
KB704662	3R	-
KB705006	3R	-
KB704596	3R	+
KB704574	3L	+
KB704729	3L	-
KB704651	3L	-
KB704862	3L	-
KB704440	3L	-
KB704895-3L	3L	+
KB704629	3L	+
KB704507	3L	-
KB705117	3L	-
KB704348	3L	+
KB704418	3L	+
